# Supplementary material for: Cocrystals of nutraceuticalp-coumaric acid with caffeine and theophylline: polymorphism and solid-state stability explored in detail using their crystal graphs
Source: Royal Society of Chemistry journal article supplement (doi:10.1039/c0ce00214c), 2010-09-22
Supplement: c0ce00214c.pdf [file c0ce00214c.pdf]

## Supporting Information

Cocrystals of nutraceutical *p*-coumaric acid with caffeine and theophylline: polymorphism and solid-state stability explored in detail using their crystal graphs

Nate Schultheiss,<sup>\*</sup> Melanie Roe, Stephan X. M. Boerrigter

*SSCI, a division of Aptuit, 3065 Kent Avenue, West Lafayette, IN 47906, USA.*

*\*Nathan.schultheiss@aptuit.com, 1.765.463.0112*

|                                            |       |
|--------------------------------------------|-------|
| XRPD of cocrystals <b>1 – 4</b> .....      | 3-6   |
| DSC and TGA overlays of <b>1 – 4</b> ..... | 7-10  |
| COMPASS calculations.....                  | 11-14 |

**Figure 1.** XRPD of *p*-coumaric acid:caffeine cocrystal, **1**

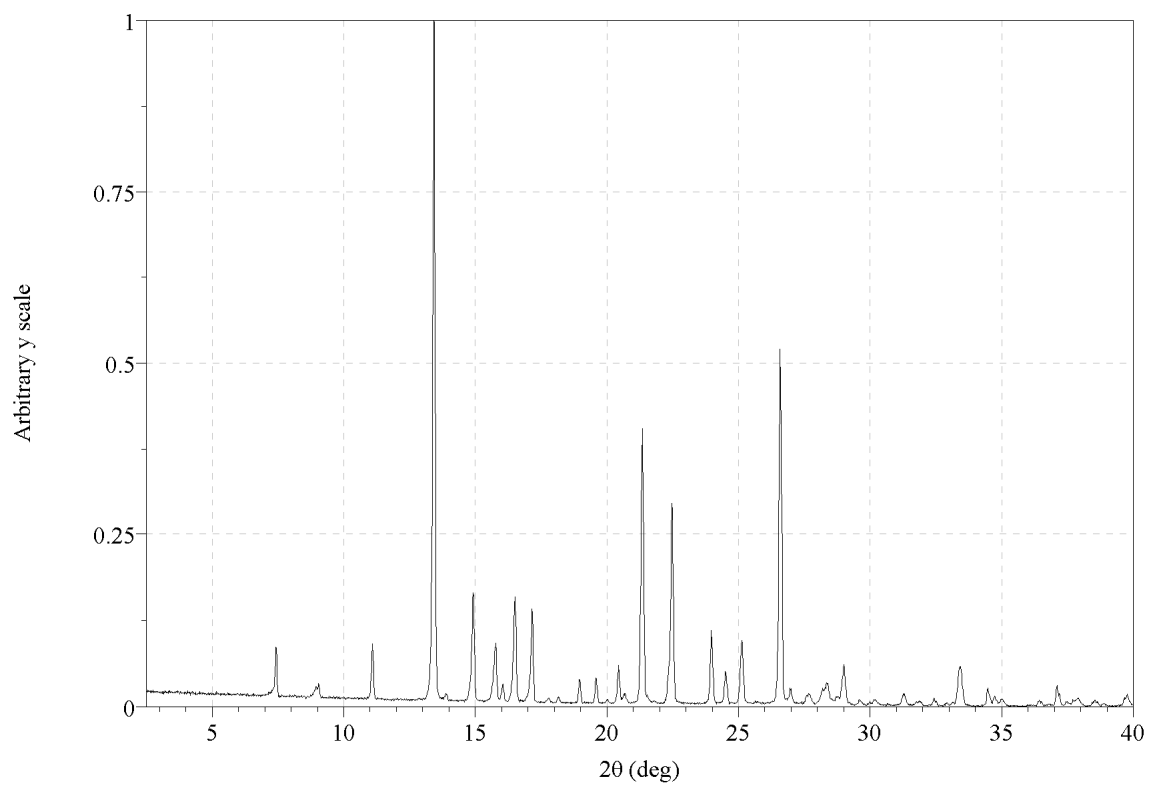

**Figure 2.** XRPD of *p*-coumaric acid:caffeine cocrystal, **2**

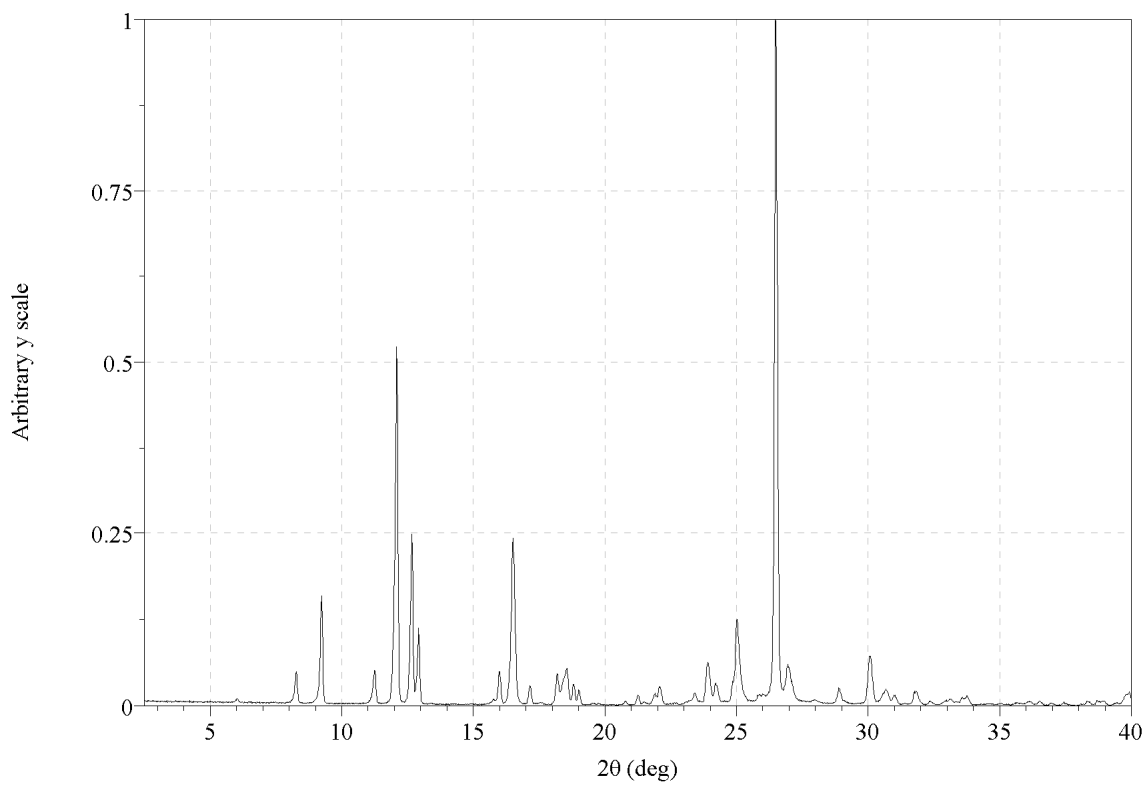

**Figure 3.** XRPD of *p*-coumaric acid:theophylline cocrystal, **3** (Form I)

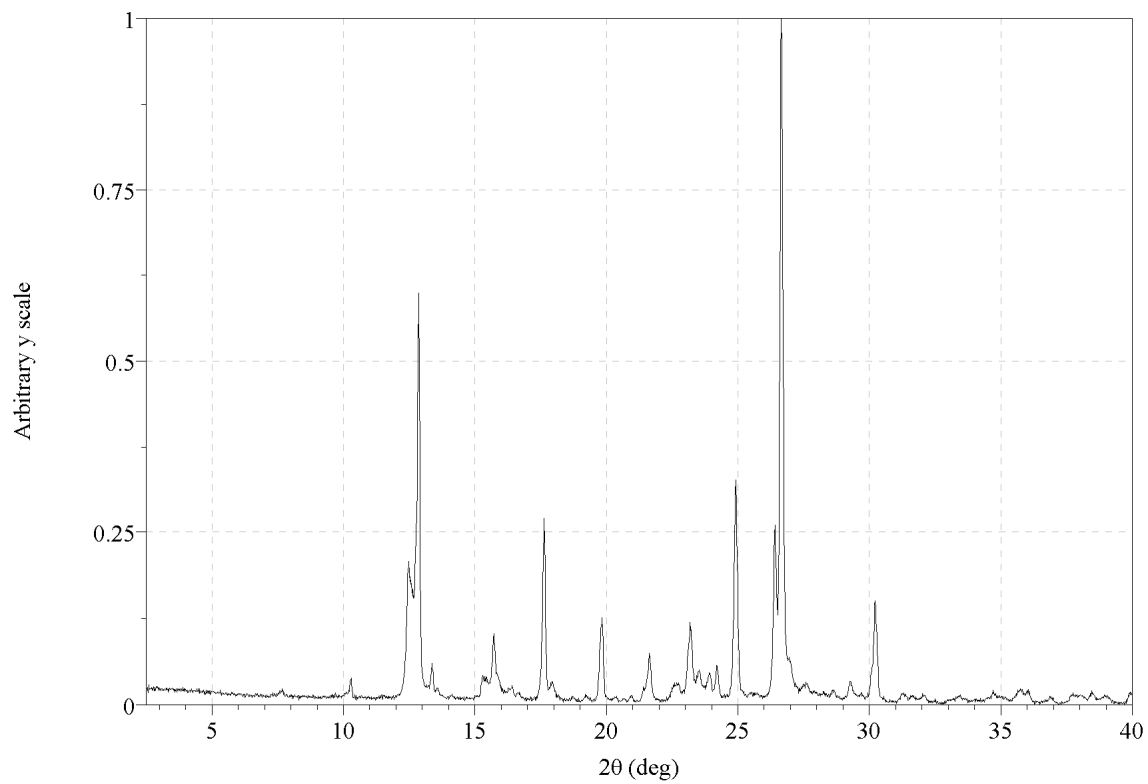

**Figure 4.** XRPD of *p*-coumaric acid:theophylline cocrystal, **4** (Form II)

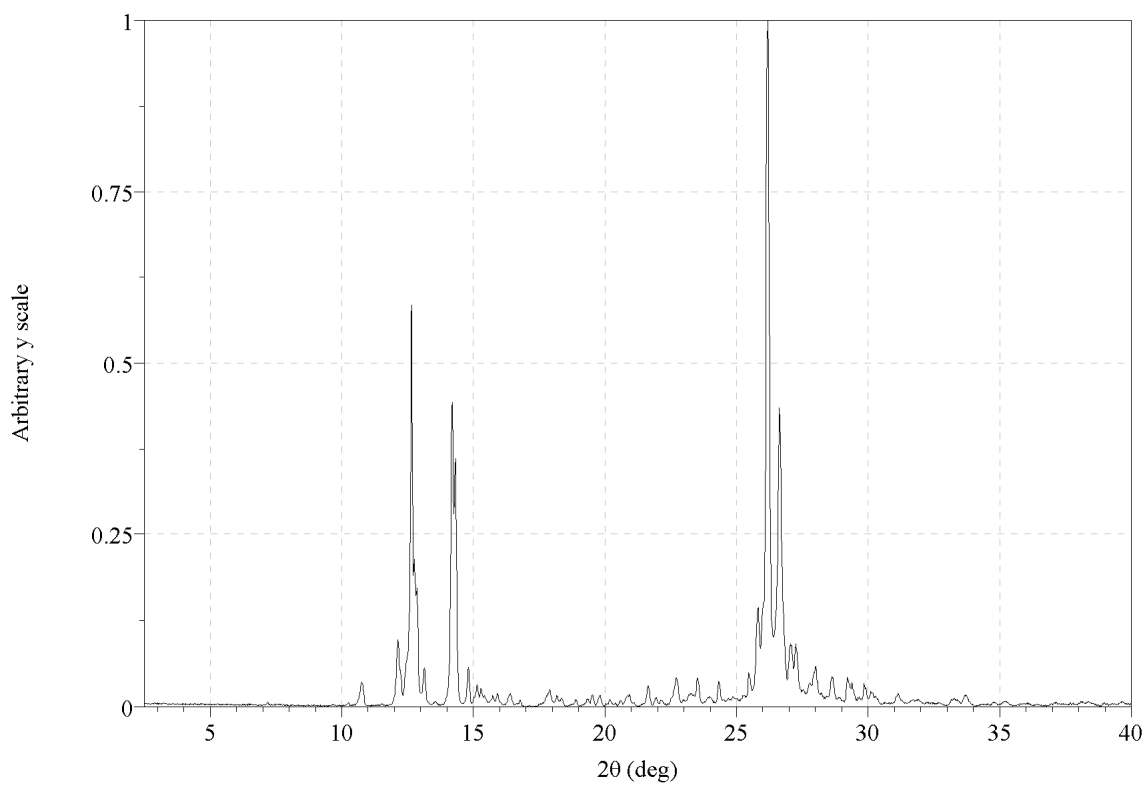

**Figure 5. DSC and TGA overlay of 1**

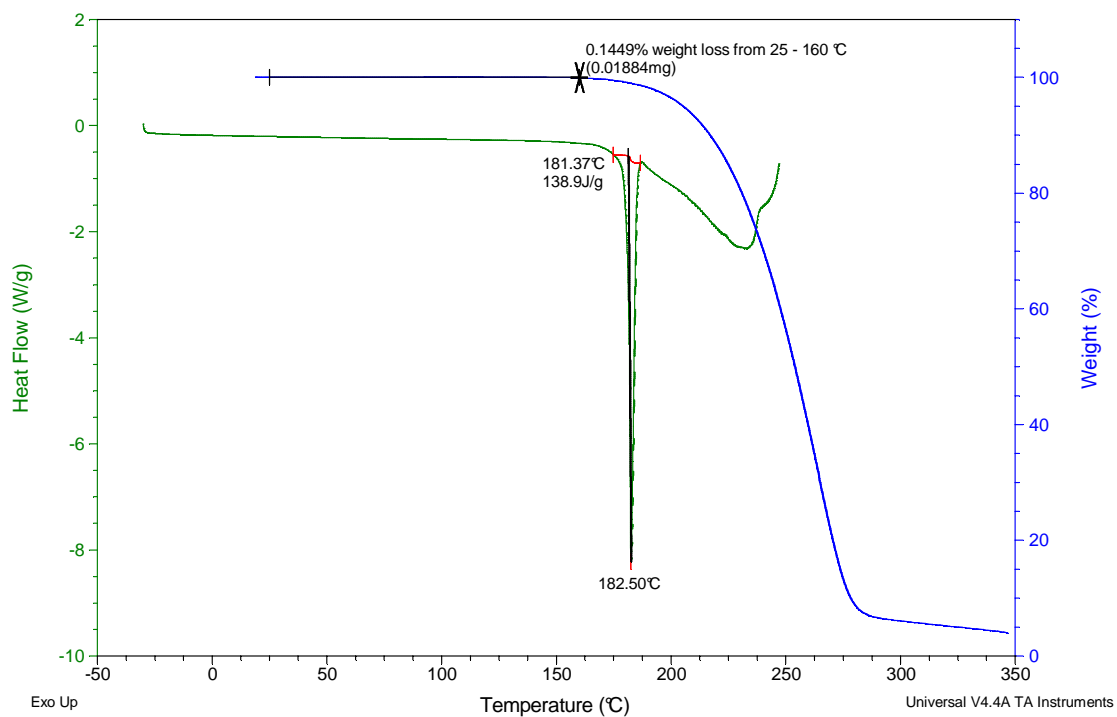

**Figure 6.** DSC and TGA overlay of **2**

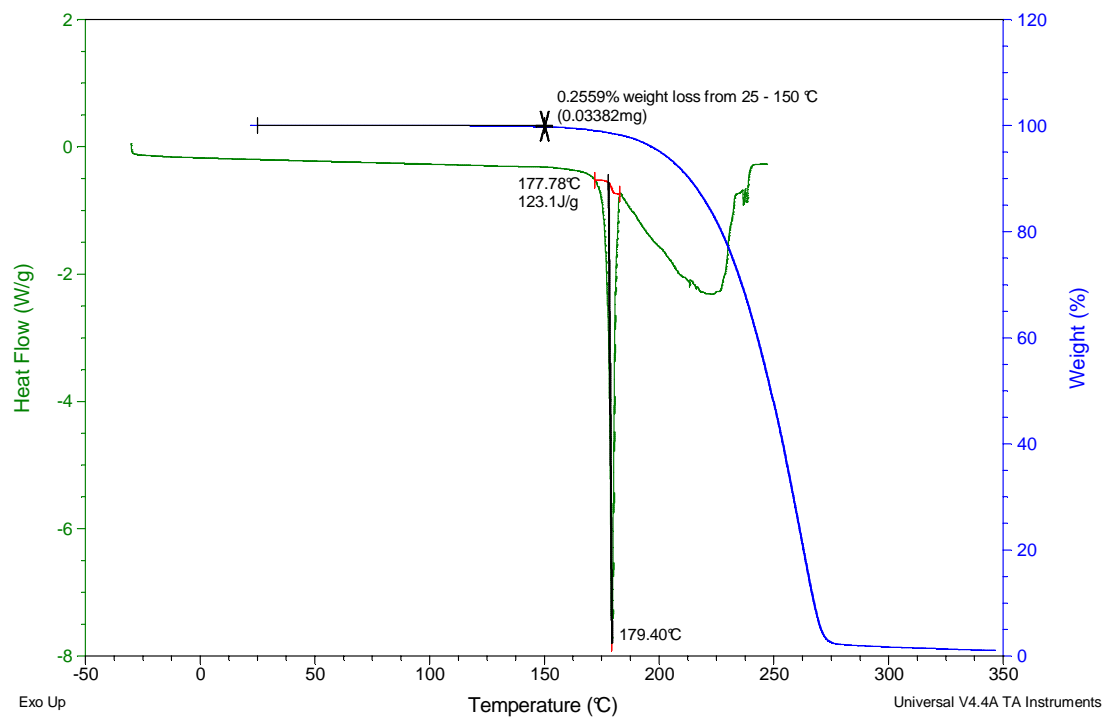



**Figure 7.** DSC and TGA overlay of **3** (Form I)

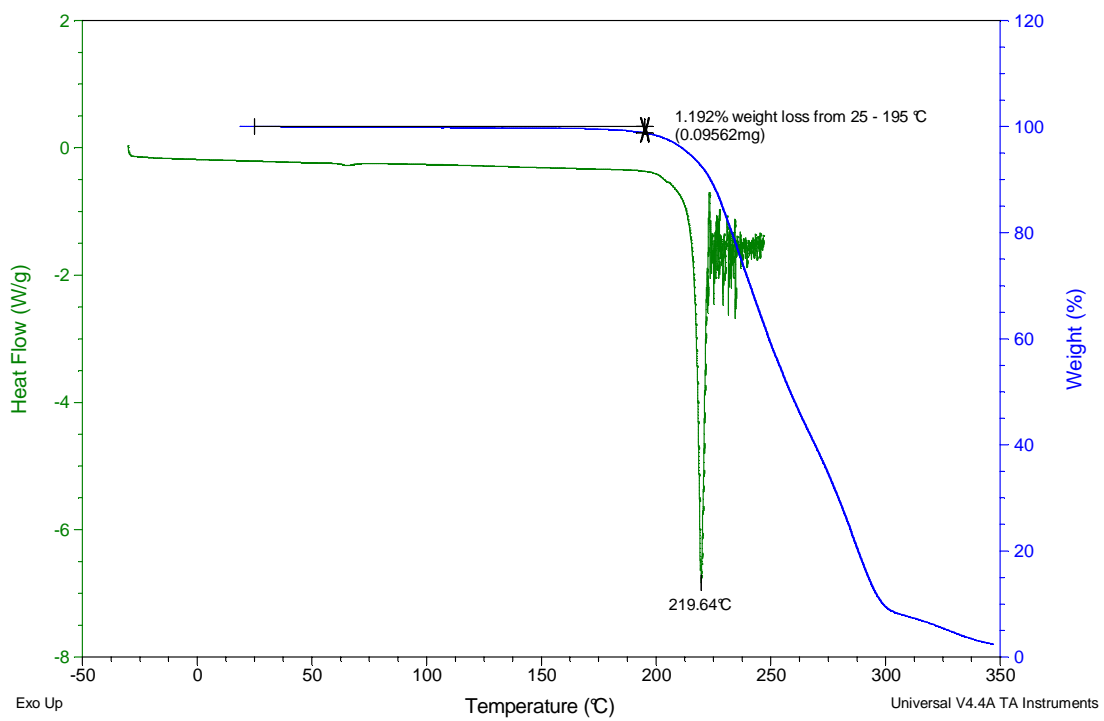

**Figure 8.** DSC and TGA overlay of **4** (Form II)

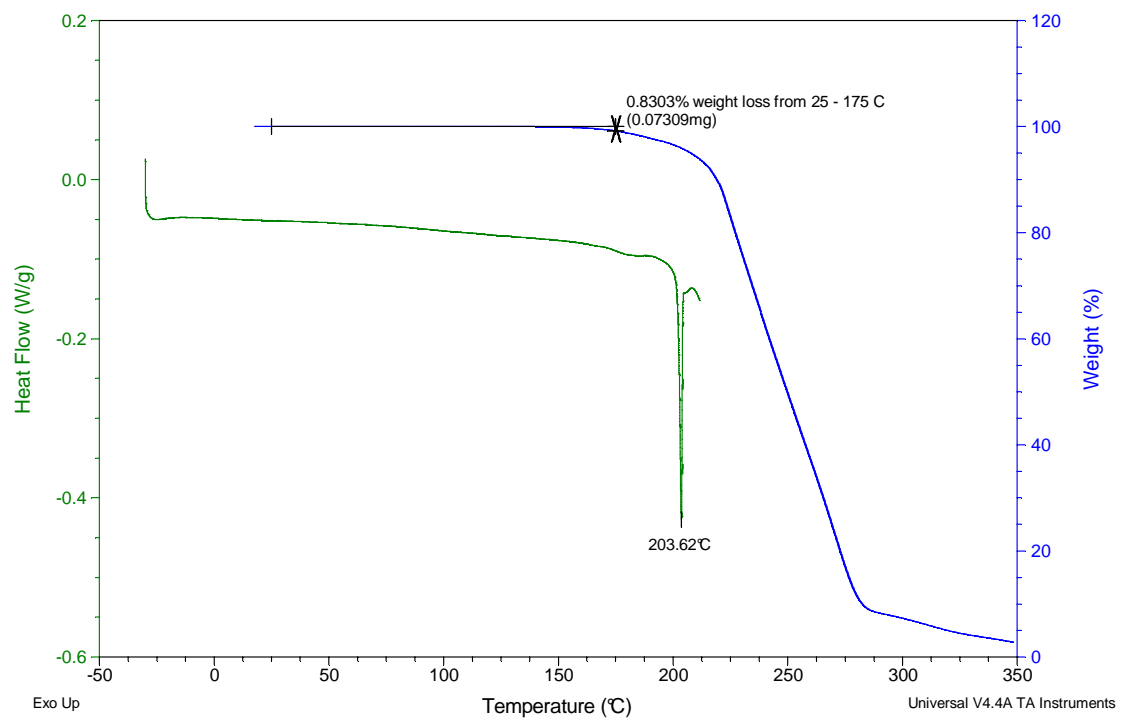



**Table 1.** Crystal graph for Form I at the default bond cutoff of  $-0.596$  kcal/mol.**key**

| Number | Molecule    | Reference Coordinate <sup>1</sup> |
|--------|-------------|-----------------------------------|
| 1      | C7 H8 N4 O2 | (0.0221497, 0.574097, 0.729905)   |
| 2      | C7 H8 N4 O2 | (0.589332, 0.0899427, 0.867573)   |
| 3      | C7 H8 N4 O2 | (0.410668, 0.9100573, 0.13243)    |
| 4      | C7 H8 N4 O2 | (0.9778503, 0.425903, 0.270095)   |
| 5      | C9 H8 O3    | (0.499478, 0.420611, 0.293522)    |
| 6      | C9 H8 O3    | (0.164907, 0.941541, 0.398635)    |
| 7      | C9 H8 O3    | (0.500522, 0.579389, 0.706478)    |
| 8      | C9 H8 O3    | (0.835093, 0.0584591, 0.601365)   |

**interactions**

| Molecule 1 | Molecule 2 | Translation <sup>2</sup> | Multiplicity <sup>3</sup> | Length (Å) <sup>4</sup> | Energy (kcal/mol) |
|------------|------------|--------------------------|---------------------------|-------------------------|-------------------|
| 1          | 5          | [-1 0 0]                 | 2                         | 8.75699                 | -13.0476          |
| 2          | 6          | [0 -1 0]                 | 2                         | 8.75689                 | -12.7897          |
| 2          | 3          | [0 -1 1]                 | 1                         | 4.23979                 | -10.5289          |
| 1          | 7          | [-1 0 0]                 | 2                         | 4.05232                 | -9.37448          |
| 1          | 5          | [0 0 1]                  | 2                         | 9.00814                 | -8.54775          |
| 2          | 6          | [1 -1 1]                 | 2                         | 8.97188                 | -8.45311          |
| 2          | 8          | [0 0 0]                  | 2                         | 4.34486                 | -7.63309          |
| 1          | 7          | [0 0 0]                  | 2                         | 3.67814                 | -7.27969          |
| 6          | 8          | [0 1 0]                  | 1                         | 6.74735                 | -4.95618          |
| 6          | 1          | [0 0 0]                  | 2                         | 6.18964                 | -4.43241          |
| 5          | 7          | [0 0 0]                  | 1                         | 7.08201                 | -4.18584          |
| 2          | 7          | [0 0 0]                  | 2                         | 6.65223                 | -4.13371          |
| 6          | 4          | [-1 1 0]                 | 2                         | 6.62399                 | -4.10297          |
| 2          | 8          | [-1 0 0]                 | 2                         | 7.40349                 | -4.09185          |
| 5          | 7          | [0 0 -1]                 | 1                         | 8.34279                 | -3.81668          |
| 2          | 1          | [0 0 0]                  | 2                         | 7.59937                 | -3.50016          |
| 2          | 3          | [1 -1 1]                 | 1                         | 7.55594                 | -3.24017          |

<sup>1</sup> The reference coordinate represents the position of the molecule in the unit cell, in fractional coordinates, by its center of mass.

<sup>2</sup> The translation to a neighbouring unit cell in which molecule 2 is located.

<sup>3</sup> Space group symmetry applies to the interactions. Multiplicity is the number of occurrences of the interaction in the unit cell.

<sup>4</sup> Length is the distance between reference points.

|   |   |           |   |         |           |
|---|---|-----------|---|---------|-----------|
| 1 | 4 | [-1 0 0]  | 1 | 7.70752 | -2.92737  |
| 6 | 4 | [-1 0 0]  | 2 | 8.33562 | -2.18623  |
| 2 | 7 | [0 -1 0]  | 2 | 8.33297 | -2.13929  |
| 6 | 8 | [-1 1 0]  | 1 | 4.34183 | -2.09630  |
| 6 | 7 | [0 0 0]   | 2 | 6.31560 | -1.93940  |
| 2 | 5 | [0 0 1]   | 2 | 8.79523 | -1.69596  |
| 2 | 5 | [0 0 0]   | 2 | 8.52143 | -1.57281  |
| 5 | 7 | [1 0 0]   | 1 | 11.0010 | -1.47991  |
| 6 | 5 | [0 1 0]   | 2 | 7.22027 | -1.44556  |
| 2 | 1 | [1 0 0]   | 2 | 7.61871 | -1.25770  |
| 1 | 4 | [-1 0 1]  | 1 | 7.66426 | -1.18557  |
| 2 | 4 | [0 0 1]   | 2 | 9.43033 | -0.988586 |
| 6 | 5 | [-1 1 0]  | 2 | 7.93649 | -0.861979 |
| 6 | 1 | [1 0 0]   | 2 | 8.87328 | -0.853893 |
| 2 | 1 | [1 -1 0]  | 2 | 8.41860 | -0.840349 |
| 2 | 1 | [0 -1 0]  | 2 | 9.64668 | -0.786347 |
| 1 | 5 | [0 0 0]   | 2 | 7.88932 | -0.747859 |
| 2 | 4 | [0 0 0]   | 2 | 9.20499 | -0.711493 |
| 6 | 5 | [0 0 0]   | 2 | 8.08576 | -0.694136 |
| 6 | 6 | [-1 0 0]  | 2 | 7.70166 | -0.662726 |
| 6 | 8 | [-1 1 -1] | 1 | 11.9018 | -0.648548 |
| 2 | 4 | [0 -1 1]  | 2 | 9.93399 | -0.637214 |
| 1 | 1 | [-1 0 0]  | 2 | 7.70166 | -0.615454 |
| 2 | 2 | [-1 0 0]  | 2 | 7.70166 | -0.613198 |

**Table 2.** Crystal graph for Form II at the default bond cutoff of  $-0.596$  kcal/mol.**key**

| Number | Molecule    | Reference Coordinate           |
|--------|-------------|--------------------------------|
| 1      | C7 H8 N4 O2 | (0.195864, 0.665954, 0.907673) |
| 2      | C7 H8 N4 O2 | (0.695864, 0.834046, 0.407673) |
| 3      | C7 H8 N4 O2 | (0.804136, 0.334046, 0.09233)  |
| 4      | C7 H8 N4 O2 | (0.304136, 0.165954, 0.59233)  |
| 5      | C9 H8 O3    | (0.246106, 0.424849, 0.216406) |
| 6      | C9 H8 O3    | (0.253894, 0.924849, 0.283594) |
| 7      | C9 H8 O3    | (0.753894, 0.575151, 0.783594) |
| 8      | C9 H8 O3    | (0.746106, 0.075151, 0.716406) |

**interactions**

| Molecule 1 | Molecule 2 | Translation | Multiplicity | Length (Å) | Energy (kcal/mol) |
|------------|------------|-------------|--------------|------------|-------------------|
| 1          | 5          | [0 0 0]     | 4            | 8.77147    | -13.1050          |
| 1          | 6          | [0 0 0]     | 4            | 8.74081    | -7.11590          |
| 1          | 7          | [-1 0 0]    | 4            | 3.82655    | -7.04750          |
| 1          | 7          | [0 0 0]     | 4            | 4.82726    | -6.51352          |
| 5          | 7          | [0 0 0]     | 2            | 6.68224    | -6.12720          |
| 5          | 7          | [-1 0 0]    | 2            | 7.64219    | -4.23363          |
| 1          | 2          | [-1 0 0]    | 4            | 6.60999    | -4.13485          |
| 1          | 5          | [0 0 1]     | 4            | 6.83216    | -2.75957          |
| 1          | 1          | [0 0 -1]    | 4            | 8.70347    | -2.21550          |
| 5          | 7          | [-1 0 -1]   | 2            | 5.97089    | -2.15436          |
| 1          | 7          | [-1 0 -1]   | 4            | 9.89452    | -2.07529          |
| 1          | 6          | [0 0 1]     | 4            | 7.49143    | -2.03350          |
| 1          | 7          | [0 0 1]     | 4            | 8.12411    | -1.75621          |
| 1          | 2          | [-1 0 1]    | 4            | 7.51421    | -1.70961          |
| 5          | 5          | [0 0 -1]    | 4            | 8.70347    | -1.01598          |
| 1          | 3          | [0 0 1]     | 2            | 9.61863    | -0.785475         |
| 5          | 7          | [0 0 -1]    | 2            | 6.88794    | -0.707682         |
| 1          | 1          | [-1 0 0]    | 4            | 6.87812    | -0.677421         |
